# Supplementary material for: Improving the Cellulose Enzymatic Digestibility of Sugarcane Bagasse by Atmospheric Acetic Acid Pretreatment and Peracetic Acid Post-Treatment
Source: MDPI journal article supplement (doi:10.3390/molecules28124689), 2023-06-10
Supplement: s1 [file s1]

# **Supporting information for: Improving the cellulose enzymatic digestibility of sugarcane bagasse by atmospheric acetic acid pretreatment and peracetic acid post-treatment**

**Yuchen Bai <sup>1,2</sup>, Mingke Tian <sup>1,2</sup>, Zhiwei Dai <sup>3,4</sup> and Xuebing Zhao <sup>3,4,\*</sup>**

<sup>1</sup> China Food Flavor and Nutrition Health Innovation Center, Beijing Technology and Business University, Beijing 100048, China; baiyuchen@btbu.edu.cn (Y.B.)

<sup>2</sup> Beijing Key Laboratory of Flavor Chemistry, Beijing Technology and Business University, Beijing 100048, China

<sup>3</sup> Key Laboratory of Industrial Biocatalysis, Ministry of Education, Tsinghua University, Beijing 100084, China

<sup>4</sup> Institute of Applied Chemistry, Department of Chemical Engineering, Tsinghua University, Beijing 100084, China

\* Correspondence: zhaoxb@mail.tsinghua.edu.cn

## Figures

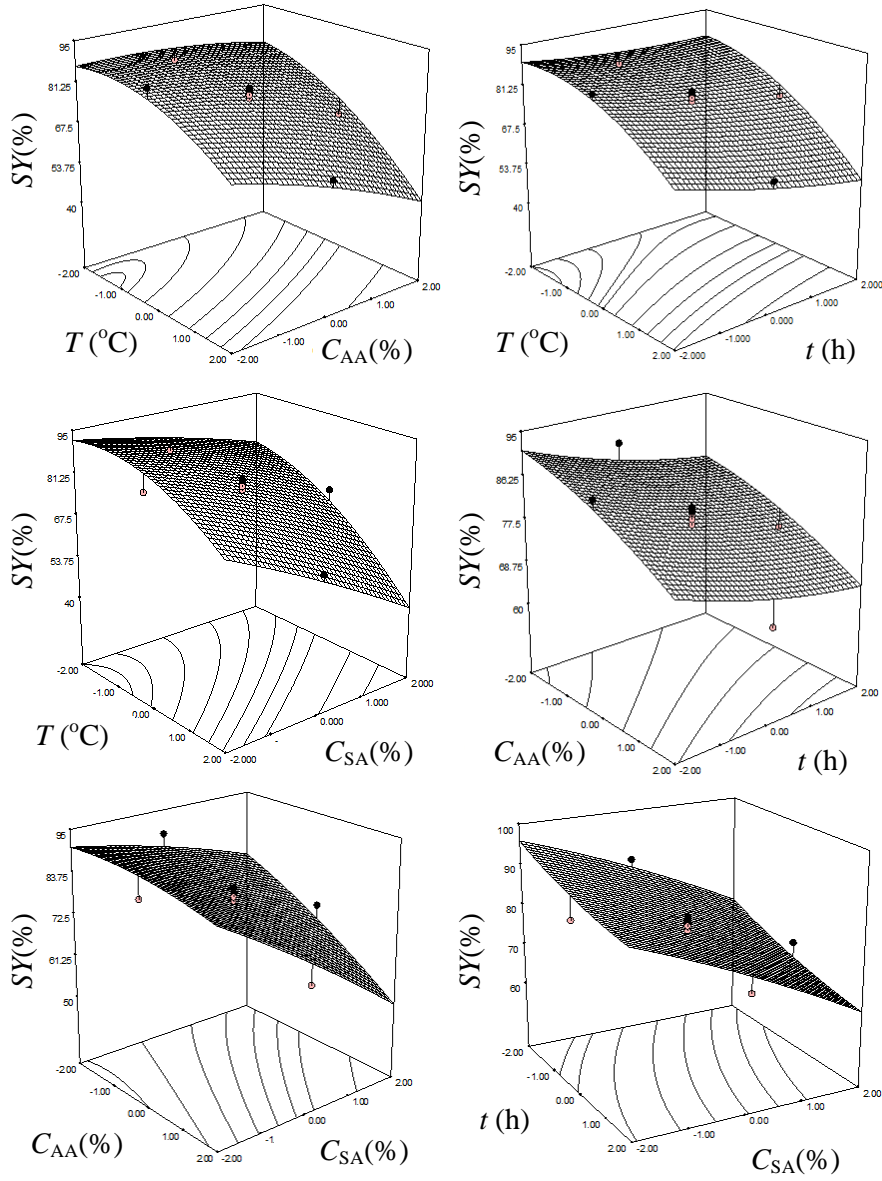

**Figure S1.** 3D surface plots of effects of temperature ( $T$ ,  $^{\circ}\text{C}$ ), AA concentration ( $C_{AA}$ , wt%), pretreatment time ( $t$ , h) and sulfuric acid concentration ( $C_{SA}$ , wt%) on solid recovery yield (SY, %).

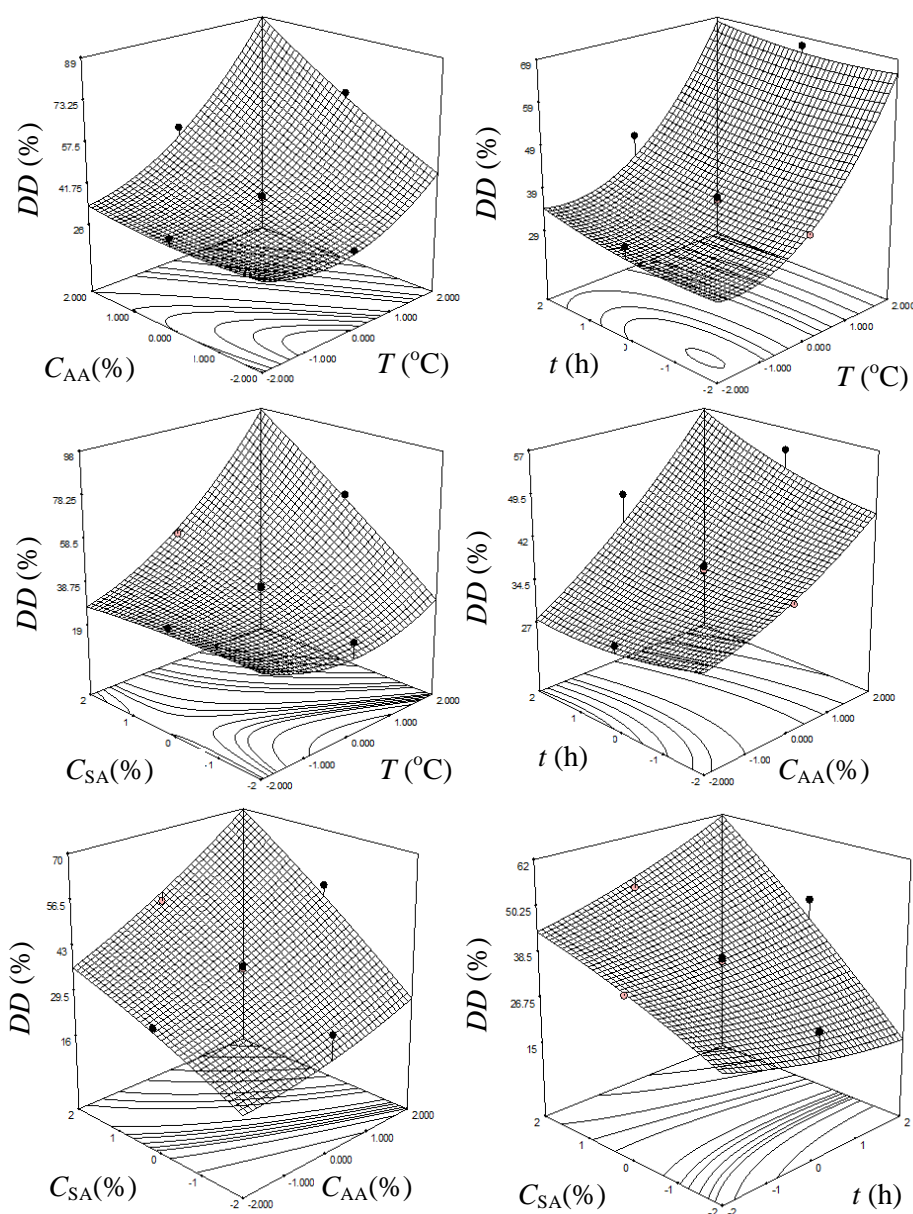

**Figure S2.** 3D surface plots of effects of temperature ( $T$ , °C), AA concentration ( $C_{AA}$ , wt%), pretreatment time ( $t$ , h) and sulfuric acid concentration ( $C_{SA}$ , wt%) on degree of delignification ( $DD$ , %).

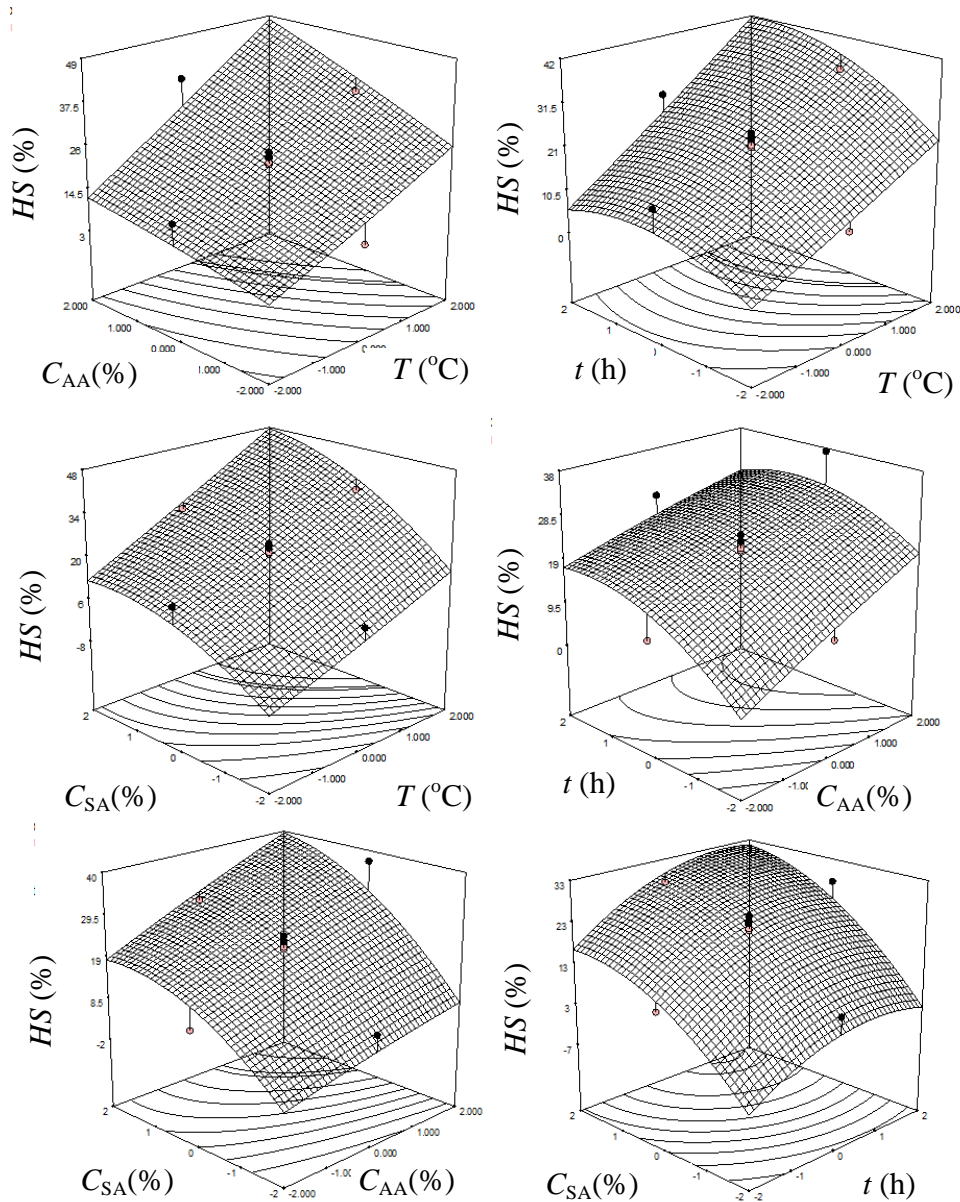

**Figure S3.** 3D surface plots of effects of temperature ( $T$ , °C), AA concentration ( $C_{AA}$ , wt%), pretreatment time ( $t$ , h) and sulfuric acid concentration ( $C_{SA}$ , wt %) on solubilization of holocellulose ( $HS$ , %).

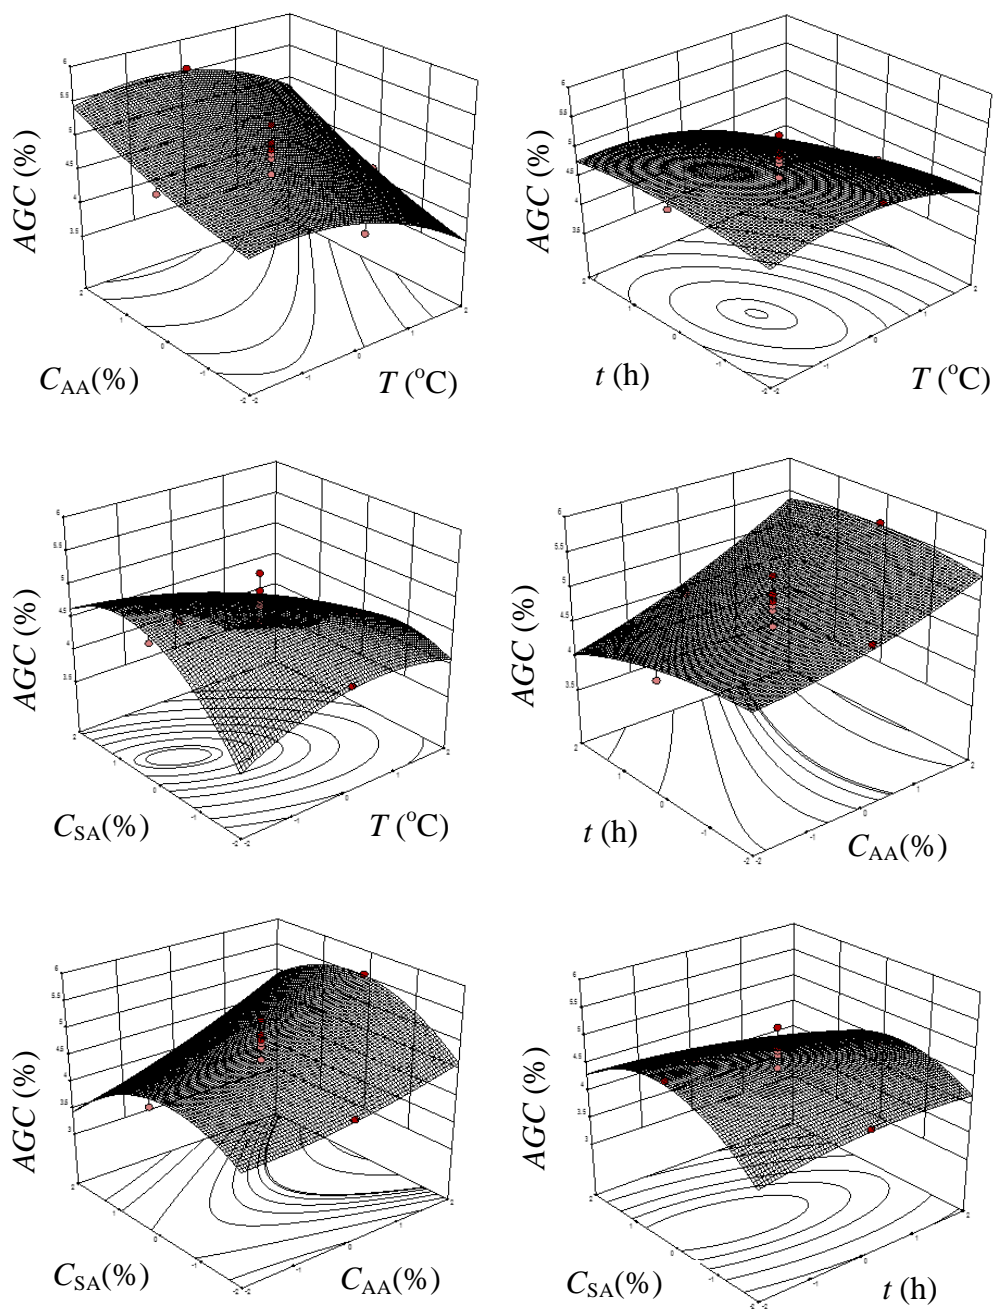

**Figure S4.** 3D surface plots of effects of temperature ( $T$ ,  $^{\circ}\text{C}$ ), AA concentration ( $C_{AA}$ , wt%), pretreatment time ( $t$ , h) and sulfuric acid concentration ( $C_{SA}$ , wt%) on acetyl group content (AGC, %) of pretreated substrates.

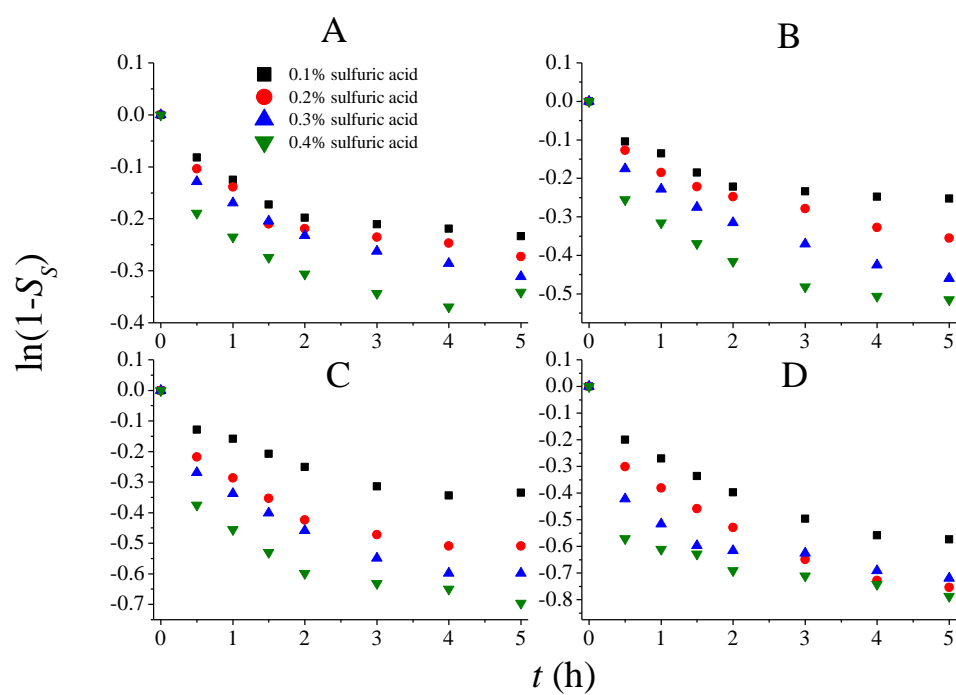

**Figure S5.** Plots of  $\ln(1-S_s)$  with  $t$  at different temperatures. A: 80 °C; B: 90 °C; C: 100 °C; D: 110 °C.

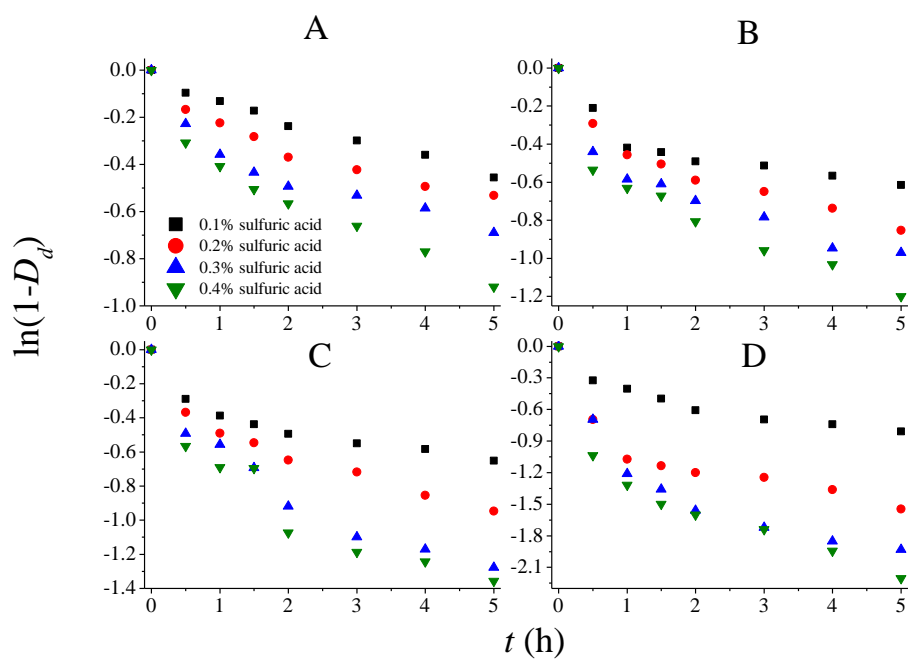

**Figure S6.** Plots of  $\ln(1-D_d)$  with  $t$  at different temperatures. A: 80 °C; B: 90 °C; C: 100 °C; D: 110 °C.

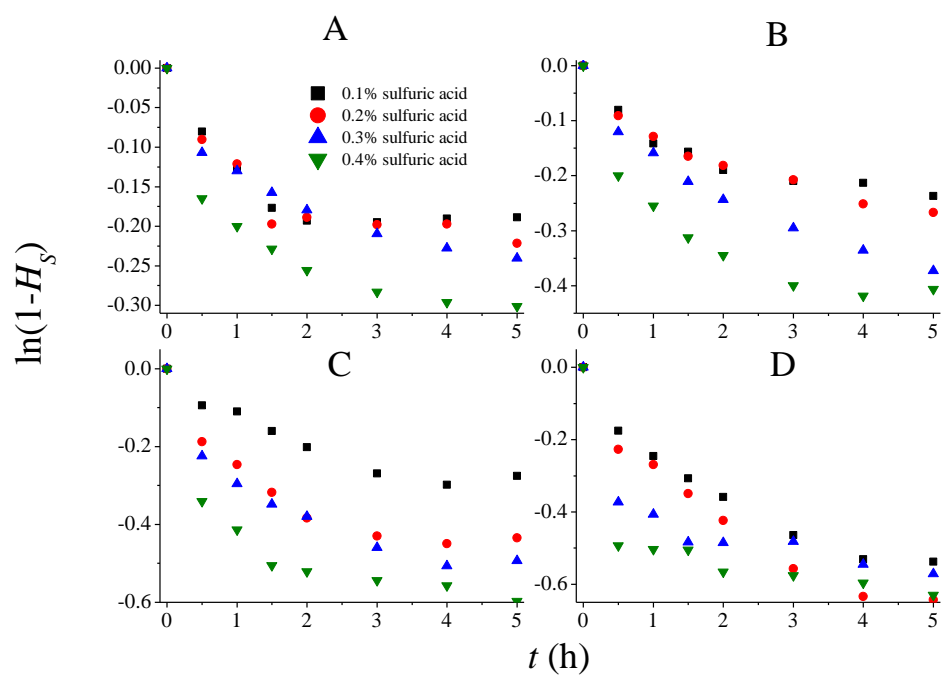

**Figure S7.** Plots of  $\ln(1-H_s)$  with  $t$  at different temperatures. A: 80 °C; B: 90 °C; C: 100 °C; D: 110 °C.

## Tables

**Table S1.** ANOVA for Response Surface Quadratic model for SY.

| Source                        | Sum of Squares | df | Mean squares | F value    | P-Value<br><i>P</i> > <i>F</i> |
|-------------------------------|----------------|----|--------------|------------|--------------------------------|
| Model                         | 2653.27        | 14 | 189.52       | 11.89      | < 0.0001                       |
| X <sub>1</sub>                | 1100.80        | 1  | 1100.80      | 69.05      | < 0.0001                       |
| X <sub>2</sub>                | 341.26         | 1  | 341.26       | 21.41      | 0.0003                         |
| X <sub>3</sub>                | 147.71         | 1  | 147.71       | 9.26       | 0.0082                         |
| X <sub>4</sub>                | 879.67         | 1  | 879.67       | 55.18      | < 0.0001                       |
| X <sub>1</sub> X <sub>2</sub> | 25.00          | 1  | 25.00        | 1.57       | 0.2297                         |
| X <sub>1</sub> X <sub>3</sub> | 9.39           | 1  | 9.39         | 0.59       | 0.4546                         |
| X <sub>1</sub> X <sub>4</sub> | 26.27          | 1  | 26.27        | 1.65       | 0.2188                         |
| X <sub>2</sub> X <sub>3</sub> | 2.500E-003     | 1  | 2.500E-003   | 1.568E-004 | 0.9902                         |
| X <sub>2</sub> X <sub>4</sub> | 29.81          | 1  | 29.81        | 1.87       | 0.1916                         |
| X <sub>3</sub> X <sub>4</sub> | 0.39           | 1  | 0.39         | 0.025      | 0.8777                         |
| X <sub>1</sub> <sup>2</sup>   | 80.48          | 1  | 80.48        | 5.05       | 0.0401                         |
| X <sub>2</sub> <sup>2</sup>   | 6.36           | 1  | 6.36         | 0.40       | 0.5370                         |
| X <sub>3</sub> <sup>2</sup>   | 3.16           | 1  | 3.16         | 0.20       | 0.6624                         |
| X <sub>4</sub> <sup>2</sup>   | 2.27           | 1  | 2.27         | 0.14       | 0.7110                         |
| Residual                      | 239.14         | 15 | 15.94        |            |                                |
| Lack of Fit                   | 231.37         | 10 | 23.14        | 14.89      | 0.0041                         |
| Pure Error                    | 7.77           | 5  | 1.55         |            |                                |
| Cor Total                     | 2892.41        | 29 |              |            |                                |

**Table S2.** ANOVA for Response Surface Quadratic model for *DD*.

| Source                        | Sum of Squares | df | Mean squares | <i>F</i> value | <i>P</i> -Value<br><i>P</i> > <i>F</i> |
|-------------------------------|----------------|----|--------------|----------------|----------------------------------------|
| Model                         | 4773.11        | 14 | 340.94       | 19.68          | < 0.0001                               |
| X <sub>1</sub>                | 1805.44        | 1  | 1805.44      | 104.24         | < 0.0001                               |
| X <sub>2</sub>                | 736.16         | 1  | 736.16       | 42.50          | < 0.0001                               |
| X <sub>3</sub>                | 16.80          | 1  | 16.80        | 0.97           | 0.3403                                 |
| X <sub>4</sub>                | 1476.74        | 1  | 1476.74      | 85.26          | < 0.0001                               |
| X <sub>1</sub> X <sub>2</sub> | 108.06         | 1  | 108.06       | 6.24           | 0.0246                                 |
| X <sub>1</sub> X <sub>3</sub> | 0.30           | 1  | 0.30         | 0.017          | 0.8966                                 |
| X <sub>1</sub> X <sub>4</sub> | 304.68         | 1  | 304.68       | 17.59          | 0.0008                                 |
| X <sub>2</sub> X <sub>3</sub> | 12.22          | 1  | 12.22        | 0.71           | 0.4142                                 |
| X <sub>2</sub> X <sub>4</sub> | 29.81          | 1  | 29.81        | 1.72           | 0.2093                                 |
| X <sub>3</sub> X <sub>4</sub> | 51.77          | 1  | 51.77        | 2.99           | 0.1044                                 |
| X <sub>1</sub> <sup>2</sup>   | 215.33         | 1  | 215.33       | 12.43          | 0.0031                                 |
| X <sub>2</sub> <sup>2</sup>   | 7.36           | 1  | 7.36         | 0.43           | 0.5243                                 |
| X <sub>3</sub> <sup>2</sup>   | 4.43           | 1  | 4.43         | 0.26           | 0.6204                                 |
| X <sub>4</sub> <sup>2</sup>   | 2.78           | 1  | 2.78         | 0.16           | 0.6946                                 |
| Residual                      | 259.80         | 15 | 17.32        |                |                                        |
| Lack of Fit                   | 259.30         | 10 | 25.93        | 255.67         | < 0.0001                               |
| Pure Error                    | 0.51           | 5  | 0.10         |                |                                        |
| Cor Total                     | 5032.91        | 29 |              |                |                                        |

**Table S3.** ANOVA for Response Surface Quadratic model for *HS*.

| Source      | Sum of Squares | df | Mean squares | <i>F</i> value | <i>P</i> -Value<br><i>P</i> > <i>F</i> |
|-------------|----------------|----|--------------|----------------|----------------------------------------|
| Model       | 3021.88        | 14 | 215.85       | 11.42          | < 0.0001                               |
| $X_1$       | 1277.50        | 1  | 1277.50      | 67.59          | < 0.0001                               |
| $X_2$       | 348.69         | 1  | 348.69       | 18.45          | 0.0006                                 |
| $X_3$       | 219.86         | 1  | 219.86       | 11.63          | 0.0039                                 |
| $X_4$       | 1024.95        | 1  | 1024.95      | 54.23          | < 0.0001                               |
| $X_1X_2$    | 11.59          | 1  | 11.59        | 0.61           | 0.4457                                 |
| $X_1X_3$    | 11.22          | 1  | 11.22        | 0.59           | 0.4529                                 |
| $X_1X_4$    | 9.21           | 1  | 9.21         | 0.49           | 0.4958                                 |
| $X_2X_3$    | 5.11           | 1  | 5.11         | 0.27           | 0.6108                                 |
| $X_2X_4$    | 8.56           | 1  | 8.56         | 0.45           | 0.5113                                 |
| $X_3X_4$    | 2.40           | 1  | 2.40         | 0.13           | 0.7264                                 |
| $X_1^2$     | 0.57           | 1  | 0.57         | 0.030          | 0.8650                                 |
| $X_2^2$     | 0.25           | 1  | 0.25         | 0.013          | 0.9102                                 |
| $X_3^2$     | 47.18          | 1  | 47.18        | 2.50           | 0.1350                                 |
| $X_4^2$     | 60.91          | 1  | 60.91        | 3.22           | 0.0928                                 |
| Residual    | 283.51         | 15 | 18.90        |                |                                        |
| Lack of Fit | 279.28         | 10 | 27.93        | 33.02          | 0.0006                                 |
| Pure Error  | 4.23           | 5  | 0.85         |                |                                        |
| Cor Total   | 3305.40        | 29 |              |                |                                        |

**Table S4.** ANOVA for Response Surface Quadratic model for AGC.

| Source                        | Sum of Squares | df | Mean squares | <i>F</i> value | <i>P</i> -Value<br><i>P</i> > <i>F</i> |
|-------------------------------|----------------|----|--------------|----------------|----------------------------------------|
| Model                         | 4.27           | 14 | 0.31         | 6.66           | 0.0004                                 |
| X <sub>1</sub>                | 0.79           | 1  | 0.79         | 17.28          | 0.0008                                 |
| X <sub>2</sub>                | 1.56           | 1  | 1.56         | 34.05          | < 0.0001                               |
| X <sub>3</sub>                | 0.13           | 1  | 0.13         | 2.88           | 0.1103                                 |
| X <sub>4</sub>                | 0.045          | 1  | 0.045        | 0.98           | 0.3371                                 |
| X <sub>1</sub> X <sub>2</sub> | 9.025E-003     | 1  | 9.025E-003   | 0.20           | 0.6635                                 |
| X <sub>1</sub> X <sub>3</sub> | 0.032          | 1  | 0.032        | 0.71           | 0.4136                                 |
| X <sub>1</sub> X <sub>4</sub> | 0.34           | 1  | 0.34         | 7.47           | 0.0154                                 |
| X <sub>2</sub> X <sub>3</sub> | 0.026          | 1  | 0.026        | 0.56           | 0.4664                                 |
| X <sub>2</sub> X <sub>4</sub> | 0.060          | 1  | 0.060        | 1.31           | 0.2704                                 |
| X <sub>3</sub> X <sub>4</sub> | 0.062          | 1  | 0.062        | 1.36           | 0.2611                                 |
| X <sub>1</sub> <sup>2</sup>   | 0.24           | 1  | 0.24         | 5.14           | 0.0385                                 |
| X <sub>2</sub> <sup>2</sup>   | 0.024          | 1  | 0.024        | 0.53           | 0.4773                                 |
| X <sub>3</sub> <sup>2</sup>   | 0.039          | 1  | 0.039        | 0.85           | 0.3709                                 |
| X <sub>4</sub> <sup>2</sup>   | 0.97           | 1  | 0.97         | 21.09          | 0.0004                                 |
| Residual                      | 0.69           | 15 | 0.046        |                |                                        |
| Lack of Fit                   | 0.40           | 10 | 0.040        | 0.69           | 0.7105                                 |
| Pure Error                    | 0.29           | 5  | 0.058        |                |                                        |
| Cor Total                     | 4.96           | 29 |              |                |                                        |
